# Supplementary material for: High-volume production of single and compound emulsions in a microfluidic parallelization arrangement coupled with coaxial annular world-to-chip interfaces
Source: Royal Society of Chemistry journal article supplement (doi:10.1039/c2lc40245a), 2012-01-01
Supplement: c2lc40245a.pdf [file c2lc40245a.pdf]

## Electronic Supplementary Information

### 1. Microfluidic chips

The six microfluidic chips used in the experiments are shown schematically in Fig. S1. The height of the microchannels is uniformly 100  $\mu\text{m}$ . Details of each chip are listed in Table S1 and S2.

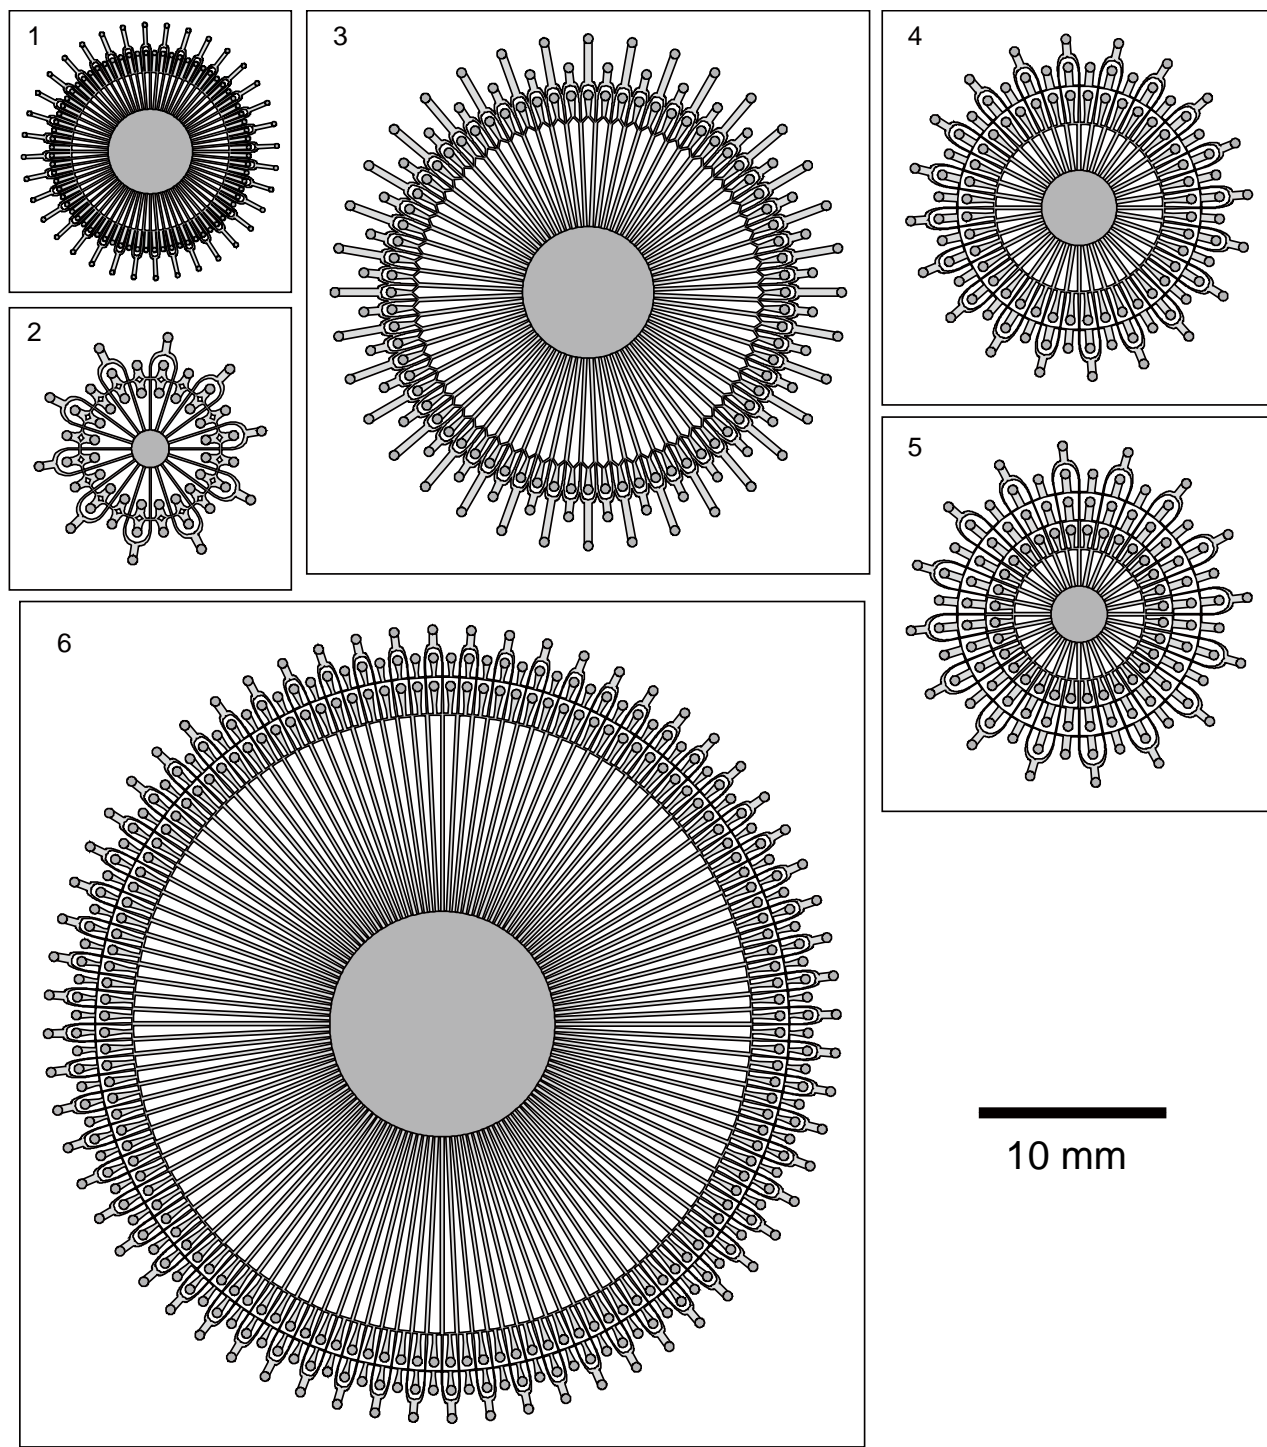

**Figure S1.** Schematic illustrations of the six microfluidic chips used.

**Table S1.** Detailed information on the microfluidic chips.

|   | Chip size<br>(mm <sup>2</sup> ) | Size of input<br>holes (μm) | Number of<br>input holes | Number of<br>infused fluids | Type of<br>emulsions | Number of final<br>droplet generators | Related figures<br>in the text |
|---|---------------------------------|-----------------------------|--------------------------|-----------------------------|----------------------|---------------------------------------|--------------------------------|
| 1 | 15 × 15                         | 250                         | 108                      | 2                           | single               | 144                                   | Fig. 1, 5                      |
| 2 | 15 × 15                         | 500                         | 50                       | 3                           | Janus                | 40                                    | Fig. 7                         |
| 3 | 30 × 30                         | 500                         | 144                      | 3                           | Janus                | 72                                    | Figs. 1, 6                     |
| 4 | 21 × 21                         | 500                         | 100                      | 3                           | double               | 40                                    | Fig. 8                         |
| 5 | 21 × 21                         | 500                         | 112                      | 4                           | triple               | 32                                    | Figs. 1, 9                     |
| 6 | 45 × 45                         | 500                         | 320                      | 3                           | double               | 128                                   | Fig. 8                         |

**Table S2.** Widths of microchannels around junctions.

| # | Innermost junctions |            | Middle junctions |            | Outermost junctions |            |
|---|---------------------|------------|------------------|------------|---------------------|------------|
|   | Output (μm)         | Input (μm) | Output (μm)      | Input (μm) | Output (μm)         | Input (μm) |
| 1 | 100                 | 100        | -                | -          | -                   | -          |
| 2 | 100                 | 100        | -                | -          | -                   | -          |
| 3 | 200                 | 100        | -                | -          | -                   | -          |
| 4 | 200                 | 100        | 100              | 50         | -                   | -          |
| 5 | 200                 | 100        | 100              | 50         | 50                  | 50         |
| 6 | 200                 | 100        | 100              | 50         | -                   | -          |

## 2. Supporting modules with annular channels

Details of supporting modules with annular channels are listed in Table S3.

**Table S3.** Supporting modules with annular channels

| # | Chip<br># | Module size<br>(mm <sup>3</sup> ) | Number<br>of<br>annulus | 1 <sup>st</sup> annulus<br>(outer) |              | 2 <sup>nd</sup> annulus |              | 3 <sup>rd</sup> annulus |              | 4 <sup>th</sup> annulus<br>(inner) |              |
|---|-----------|-----------------------------------|-------------------------|------------------------------------|--------------|-------------------------|--------------|-------------------------|--------------|------------------------------------|--------------|
|   |           |                                   |                         | i.d.<br>(mm)                       | o.d.<br>(mm) | i.d.<br>(mm)            | o.d.<br>(mm) | i.d.<br>(mm)            | o.d.<br>(mm) | i.d.<br>(mm)                       | o.d.<br>(mm) |
| 1 | 1         | 36 × 36 × 24                      | 2                       | 13                                 | 14           | 10                      | 11           | -                       | -            | -                                  | -            |
| 2 | 2         | 36 × 36 × 32                      | 3                       | 11.5                               | 12.5         | 8.5                     | 9.5          | 5.5                     | 6.5          | -                                  | -            |
| 3 | 3         | 48 × 48 × 32                      | 3                       | 26.5                               | 27.5         | 23.5                    | 24.5         | 20.5                    | 21.5         | -                                  | -            |
| 4 | 4         | 40 × 40 × 32                      | 3                       | 17.5                               | 18.5         | 14.5                    | 15.5         | 11.5                    | 12.5         | -                                  | -            |
| 5 | 5         | 40 × 40 × 40                      | 4                       |                                    |              |                         |              |                         |              | 8.5                                | 9.5          |
| 6 | 6         | 64 × 64 × 32                      | 3                       | 41.5                               | 42.5         | 38.5                    | 39.5         | 35.5                    | 36.5         | -                                  | -            |

### 3. Production rates

Table S4 lists the production rates demonstrated in this study. These flow rates were not the maximized flow rates in the microfluidic modules we used.

**Table S4.** Production rates demonstrated in this study.

| Chip# | Type of emulsions  | Number of final droplet generators | Production rate                                                                   | Related figures in the text |
|-------|--------------------|------------------------------------|-----------------------------------------------------------------------------------|-----------------------------|
| 1     | single             | 144                                | 180 mL h <sup>-1</sup>                                                            | Fig. 1, 5                   |
| 2     | Janus (immiscible) | 40                                 | 20 mL h <sup>-1</sup> (10+10)                                                     | Fig. 7                      |
| 3     | Janus (miscible)   | 72                                 | 72 mL h <sup>-1</sup> (36+36)                                                     | Fig. 6                      |
| 4     | double             | 40                                 | 25 mL h <sup>-1</sup> (5+20, two-step)<br>20 mL h <sup>-1</sup> (10+10, one-step) | Figs. 8b-g<br>Fig. 8h       |
| 5     | triple             | 32                                 | 31 mL h <sup>-1</sup> (5+6+20, three-step)                                        | Fig. 9                      |
| 6     | double             | 128                                | 75 mLh <sup>-1</sup> (15+60, two-step)                                            | Fig. 8i                     |

### Supplemental Movie Captions:

1\_cross144.mpg: Movie clip of the formation of O/W emulsion droplets in the module having 144 cross-flowing MFDGs, recorded at 6000 fps. Disperse phase flow rate ( $Q_d$ ) was  $180.0 \text{ mL h}^{-1}$  and continuous phase flow rate ( $Q_c$ ) was  $270.0 \text{ mL h}^{-1}$ .

2\_sheath72-Janus.mpg: Movie clip of the formation of Janus droplets of two miscible segments in the module having 72  $\psi$ -shaped MFDGs, recorded at 4000 fps. Flow rates were  $Q_d = 72.0 \text{ mL h}^{-1}$  ( $36.0 \text{ mL h}^{-1} \times 2$ ) and  $Q_c = 576 \text{ mL h}^{-1}$ .

3\_cross40-Janus.mpg: Movie clip of the formation of Janus droplets in the module having 40 cross-flowing MFDGs, recorded at 3000 fps. Flow rates were  $Q_d = 20.0 \text{ mL h}^{-1}$  ( $10.0 \text{ mL h}^{-1} \times 2$ ) and  $Q_c = 40.0 \text{ mL h}^{-1}$ .

4\_40-double-twostep-single.mpg: Movie clip of the two-step formation of single core O/O/W double emulsion droplets in the module having 40 sets of two-consecutive cross-shaped MFDGs, recorded at 3000 fps. Flow rates were  $Q_d = 25.0 \text{ mL h}^{-1}$  (core  $5.0 \text{ mL h}^{-1}$  + shell  $20.0 \text{ mL h}^{-1}$ ) and  $Q_c = 500.0 \text{ mL h}^{-1}$ .

5\_40-double-twostep-dual.mpg: Movie clip of the two-step formation of dual core O/O/W double emulsion droplets in the module having 40 sets of two-consecutive cross-shaped MFDGs, recorded at 3000 fps. Flow rates were  $Q_d = 25.0 \text{ mL h}^{-1}$  (core  $5.0 \text{ mL h}^{-1}$  + shell  $20.0 \text{ mL h}^{-1}$ ) and  $Q_c = 250.0 \text{ mL h}^{-1}$ .

6\_40-double-onestep.mpg: Movie clip of the one-step formation of single core O/O/W double emulsion droplets in the module having 40 sets of two-consecutive cross-shaped MFDGs, recorded at 1000 fps. Flow rates were  $Q_d = 20.0 \text{ mL h}^{-1}$  (core  $10.0 \text{ mL h}^{-1}$  + shell  $10.0 \text{ mL h}^{-1}$ ) and  $Q_c = 150.0 \text{ mL h}^{-1}$ .

7\_128-double-twostep.mpg: Movie clip of the two-step formation of O/O/W double emulsion droplets in the module having 128 sets of two-consecutive cross-shaped MFDGs, recorded at 2000 fps. Flow rates were  $Q_d = 75.0 \text{ mL h}^{-1}$  (core  $15.0 \text{ mL h}^{-1}$  + shell  $60.0 \text{ mL h}^{-1}$ ) and  $Q_c = 600.0 \text{ mL h}^{-1}$ .

All movies are prepared in MPEG-1 format.
